# Supplementary material for: Seasonal and mesoscale variability of oceanic transport of anthropogenic CO 2
Source: Copernicus journal article supplement (doi:10.5194/bg-6-2509-2009), 2009-11-09
Supplement: Supplementary file 1 [file bg-6-2509-2009-supplement.pdf]

**SUPPLEMENTARY MATERIAL: Seasonal  
and Mesoscale Variability of Oceanic Transport  
of Anthropogenic CO<sub>2</sub>**

Zouhair Lachkar<sup>1</sup>  
James Orr  
Jean-Claude Dutay

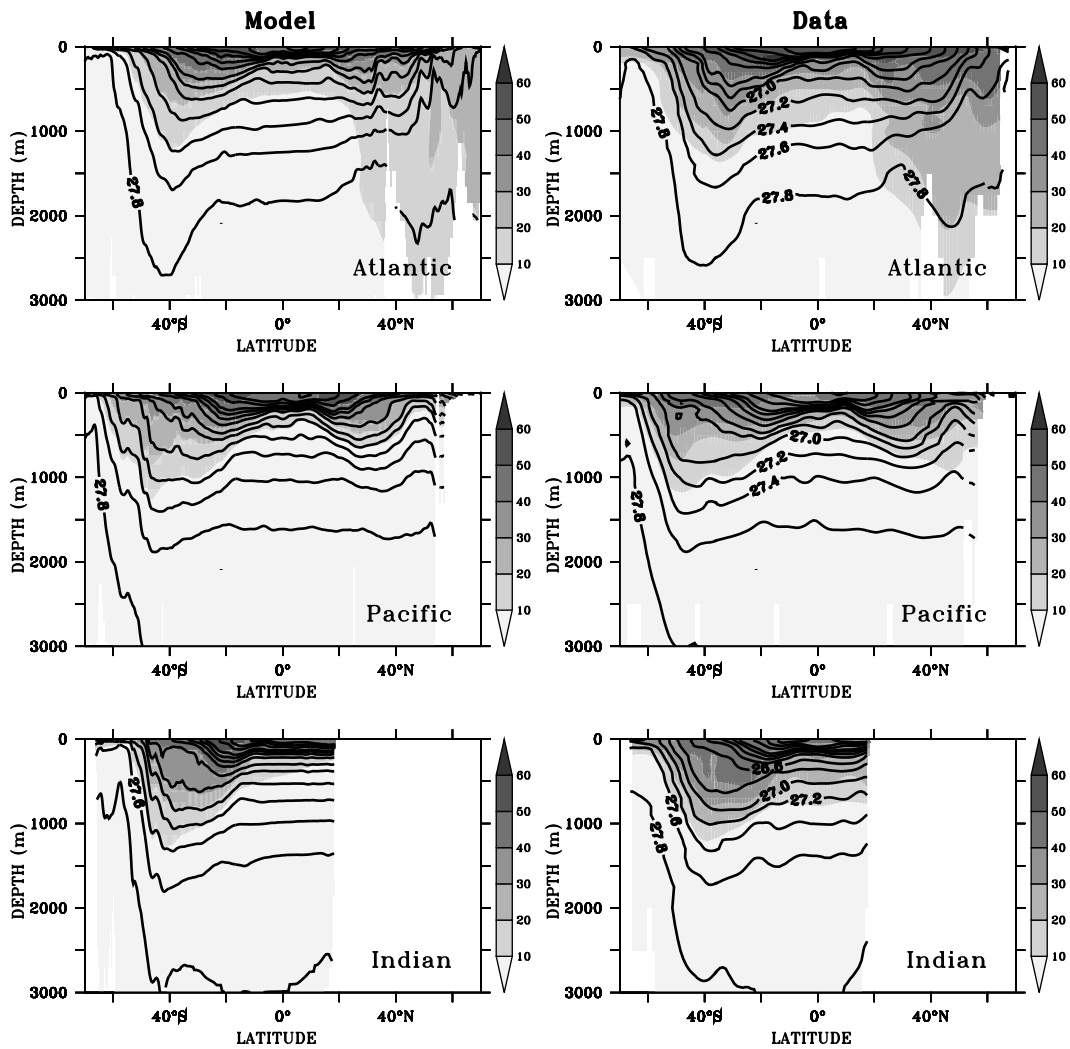

Fig. 1. The potential density field (black contours) superimposed over the anthropogenic CO<sub>2</sub> concentration (in  $\mu\text{mol kg}^{-1}$ ) field (shading) along 30°W in the Atlantic Ocean (top), 170°W in the Pacific Ocean (middle) and 85°E in the Indian Ocean (bottom) in 1994, as simulated by the eddy-permitting model (left) and from data (right).

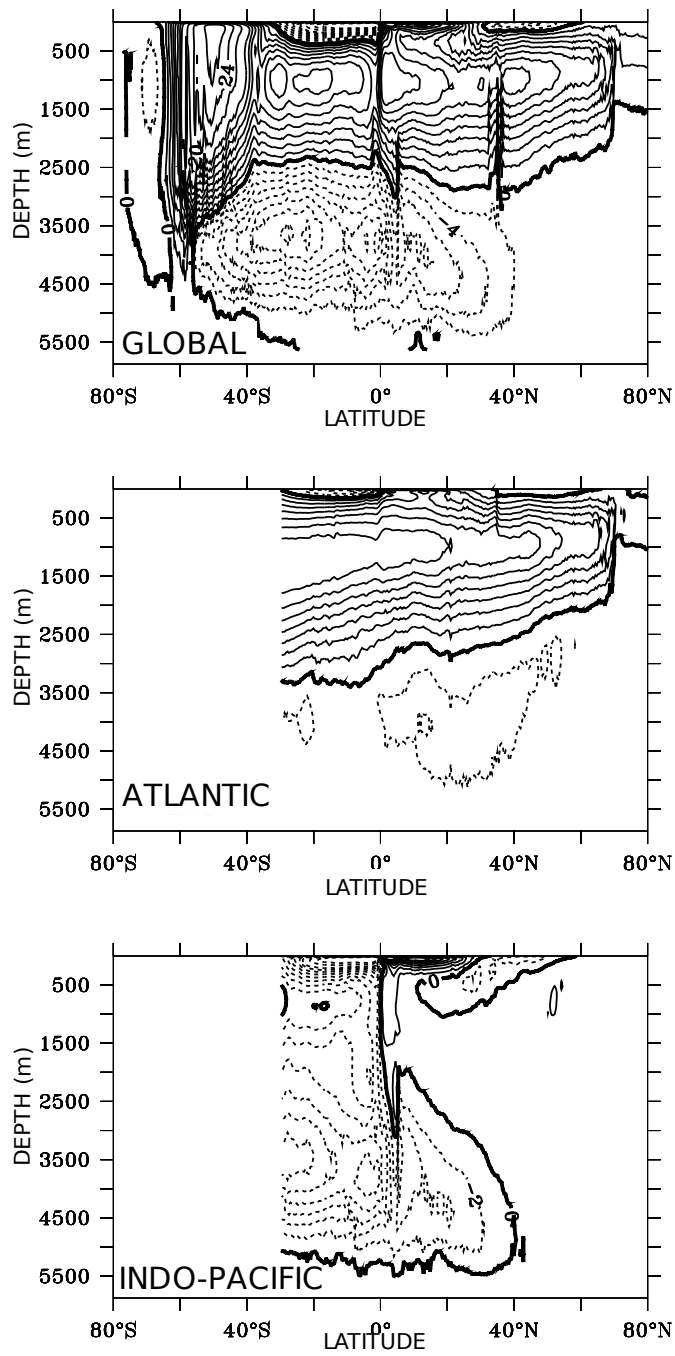

Fig. 2. Simulated annual-mean overturning for the global ocean (top), the Atlantic Ocean (middle), and the Indo-Pacific Ocean (bottom). Negative values are in dotted lines and indicate counterclockwise overturning.

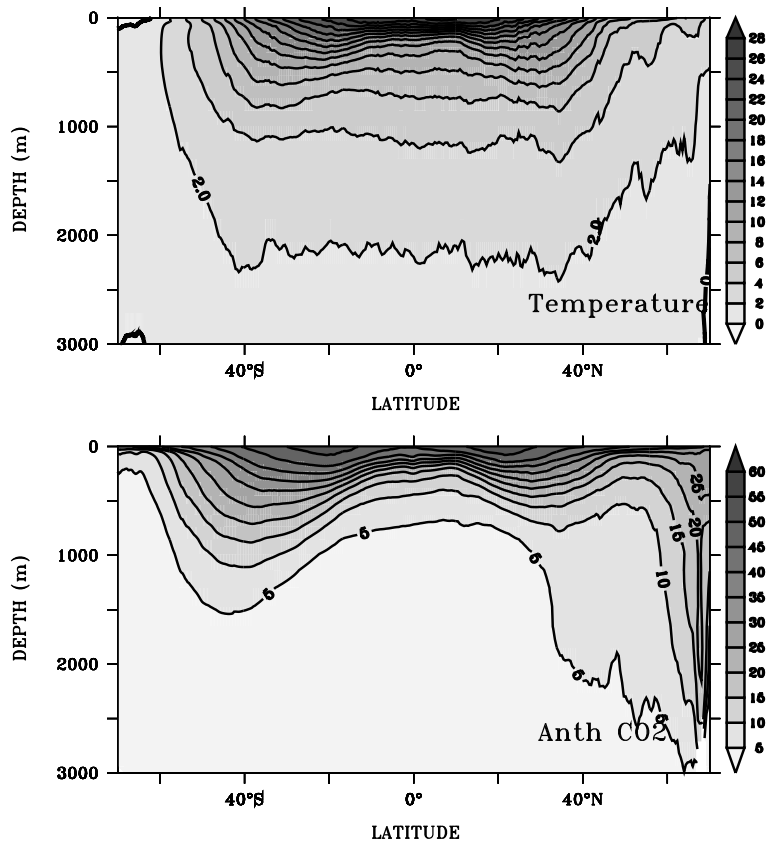

Fig. 3. Zonally averaged temperature (top) and anthropogenic CO<sub>2</sub> (bottom) concentrations over the upper 3000 m, respectively in °C and  $\mu\text{mol kg}^{-1}$ .
